# Supplementary material for: Identification of the structural determinants for efficient glucose transport via segment swapping between two fungal glucose transporters
Source: Royal Society of Chemistry journal article supplement (doi:10.1039/c7ra01095h), 2017-01-01
Supplement: c7ra01095h1.pdf [file c7ra01095h1.pdf]

**Identification of the structural determinants for efficient  
glucose transport via segment swapping between  
two fungal glucose transporters**

**Weixin Zhang, Yanli Cao, Guanjun Chen, Weifeng Liu\***

State Key Laboratory of Microbial Technology, School of Life Science,  
Shandong University, No.27 Shanda South Road, Jinan 250100,  
Shandong, P. R. China

\*Correspondence should be addressed to Weifeng Liu. Tel.:+86 531  
88364324; Fax: +86 531 88565610; e-mail: weifliu@sdu.edu.cn

**Supplementary data**

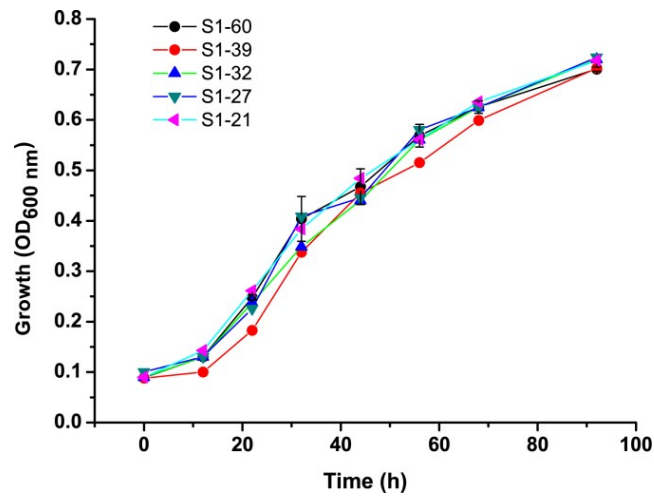

Fig. S1. Growth curves of yeast cells expressing the chimeras S1-60, S1-39, S1-32, S1-27, and S1-21 with 1% glucose as the sole carbon source, respectively.
